# Supplementary material for: Spin crossover in a heptanuclear mixed-valence iron complex
Source: Royal Society of Chemistry journal article supplement (doi:10.1039/b919120h), 2010-01-01
Supplement: b919120h.pdf [file b919120h.pdf]

## Supplementary material

### A. Electron UV-VIS and infra-red spectra for $\mathbf{1} = [\{\text{Fe}^{\text{II}}(\text{CN})_6\}\{\text{Fe}^{\text{III}}(\text{salpet})_6\}]_6\text{Cl}_2$ .

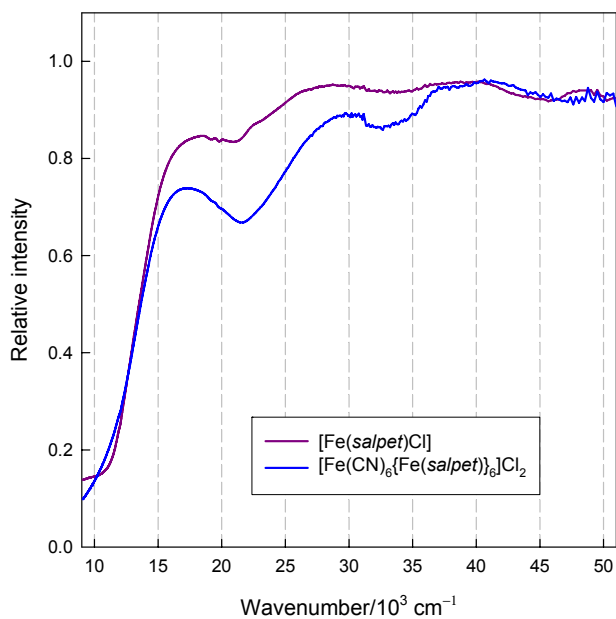

Fig. S1. Electron spectra of *salpet*-containing complexes [Nujol mull (Analytical Jena, Specord 200), 10000 – 50000 cm<sup>-1</sup>]

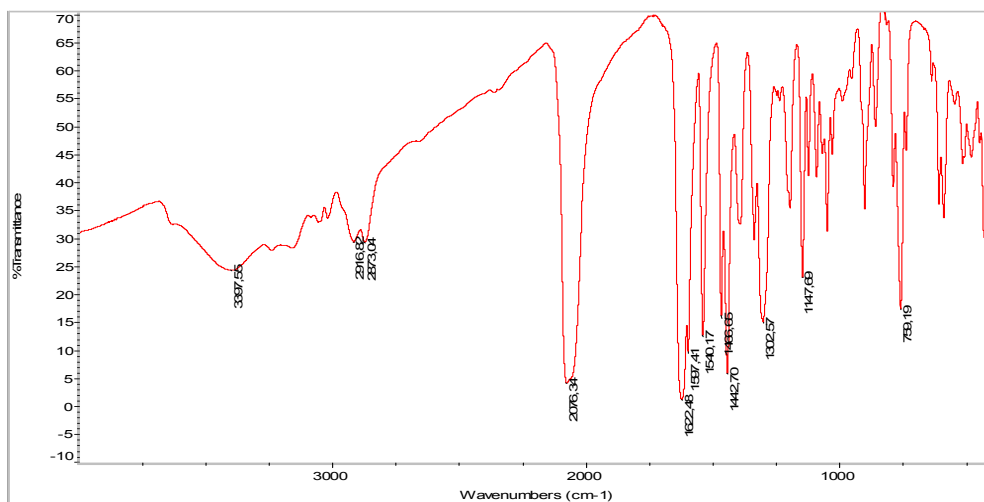

Fig. S2. MID-IR spectrum of  $\mathbf{1}$  [KBr pellets (Nicolet, Magna FTIR 750), 4000 – 400 cm<sup>-1</sup>]

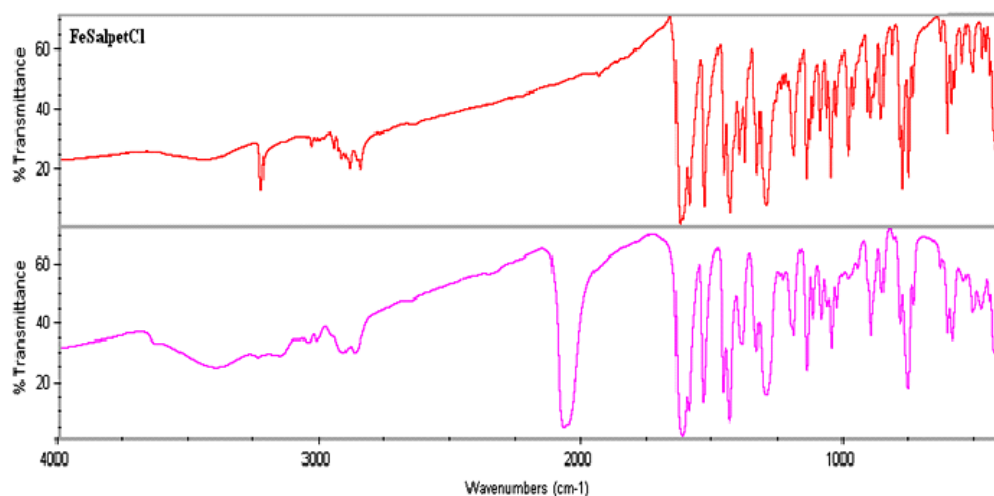

Fig. S3. MID-IR spectrum of **1** and its comparison with the mononuclear precursor [Fe(Salpet)Cl]

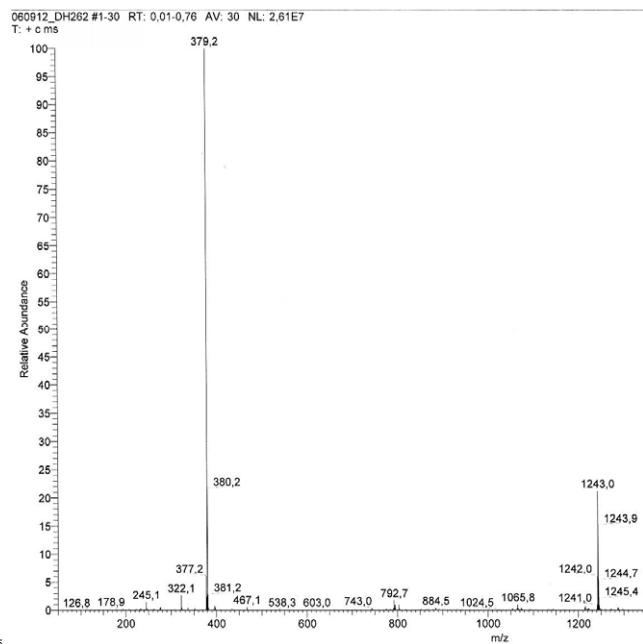

Fig. S4. ESI-mass spectra. The heptanuclear complex shows the molpeak in:  $m/z (=K^{2+}/2)$ :  $1244 \text{ g mol}^{-1}$  which matches the composition  $[K]Cl_2$ ; the molar mass of  $[K^{2+}]$  is  $2488 \text{ g mol}^{-1}$ ;  $K^{2+}$  is the heptanuclear molecular dication  $[\{Fe^{II}(CN)_6\} \{Fe^{III}(salpet)\}_6]^{2+}$ . Molpeak  $m/z (=L^+/1)$ :  $379.2 \text{ g mol}^{-1}$  is exactly the  $L = [Fe^{III}(salpet)]^+$  fragment.

**B. Deconvolution of the Mössbauer spectra for 1**

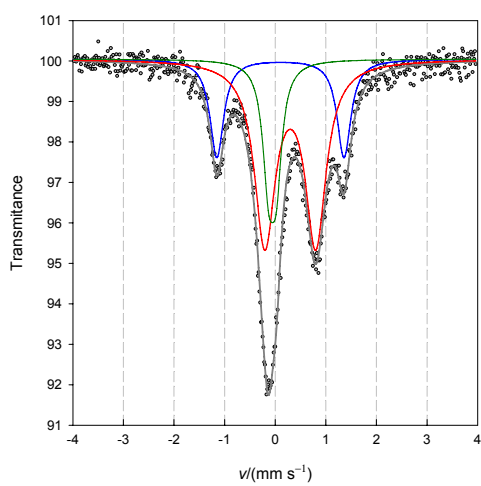

$T = 20 \text{ K}$

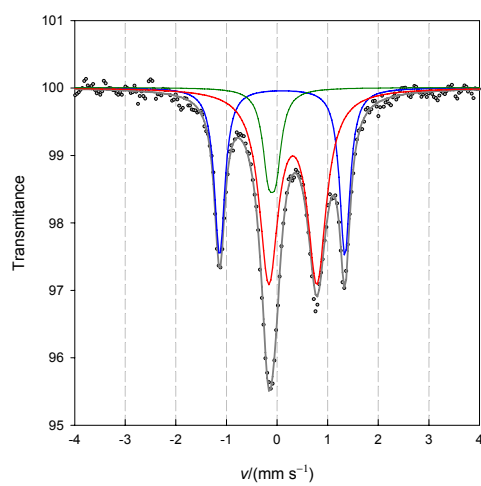

$T = 78 \text{ K}$

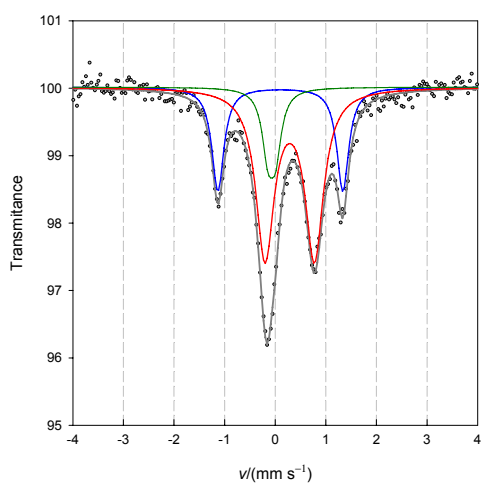

$T = 120 \text{ K}$

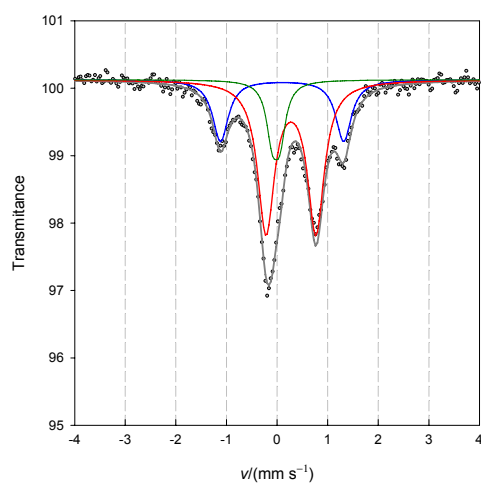

$T = 150 \text{ K}$

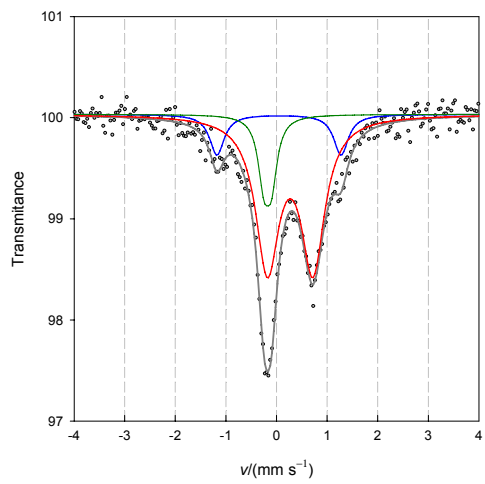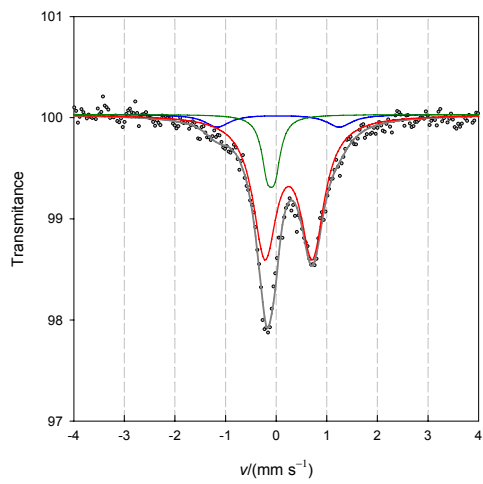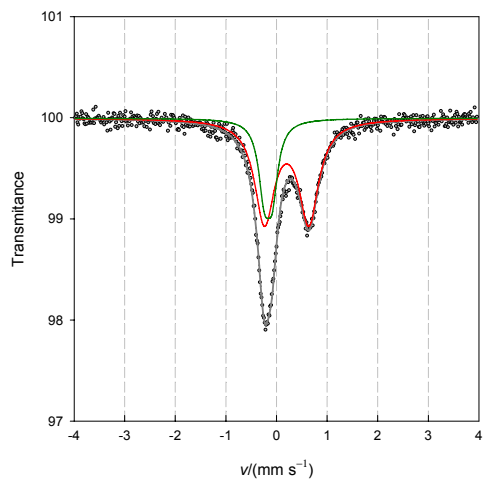

**C. Selected interatomic distances**

|                                   | Fe2       | Fe3      | Fe4       |
|-----------------------------------|-----------|----------|-----------|
| Fe <sup>II</sup> -C(cyanide)      | 1.879(9)  | 1.888(8) | 1.932(10) |
| Fe <sup>III</sup> -N(cyanide)     | 2.058(9)  | 2.033(7) | 2.013(10) |
| Fe <sup>III</sup> -O(phenolate)   | 1.897(7)  | 1.960(6) | 1.823(10) |
|                                   | 1.947(7)  | 1.960(5) | 1.863(10) |
| Fe <sup>III</sup> -N(amine) -NH-  | 2.161(9)  | 2.157(7) | 2.020(13) |
| Fe <sup>III</sup> -N(imine) -N=C- | 2.028(12) | 2.086(9) | 1.832(15) |
|                                   | 2.034(10) | 2.110(8) | 1.924(15) |

← | Formatted Table

Comment [DJM1]: tato je  
dobra
